# Supplementary material
Source: PubMed Central journal article supplement (PMC2735987)
Supplement: pp.109.142125_1.pdf [file pp.109.142125_1.pdf]

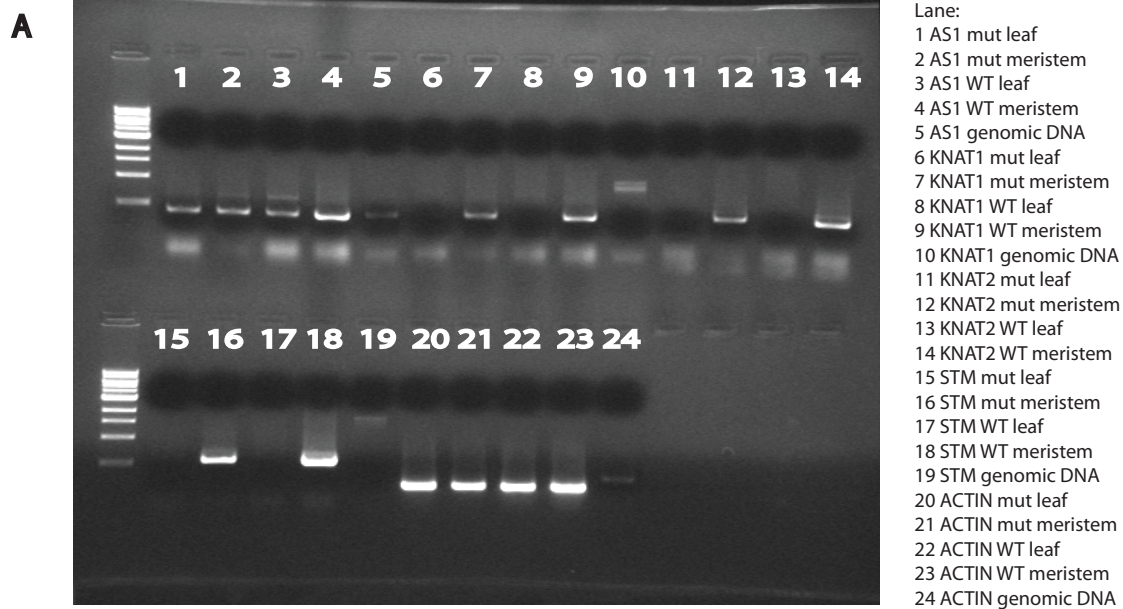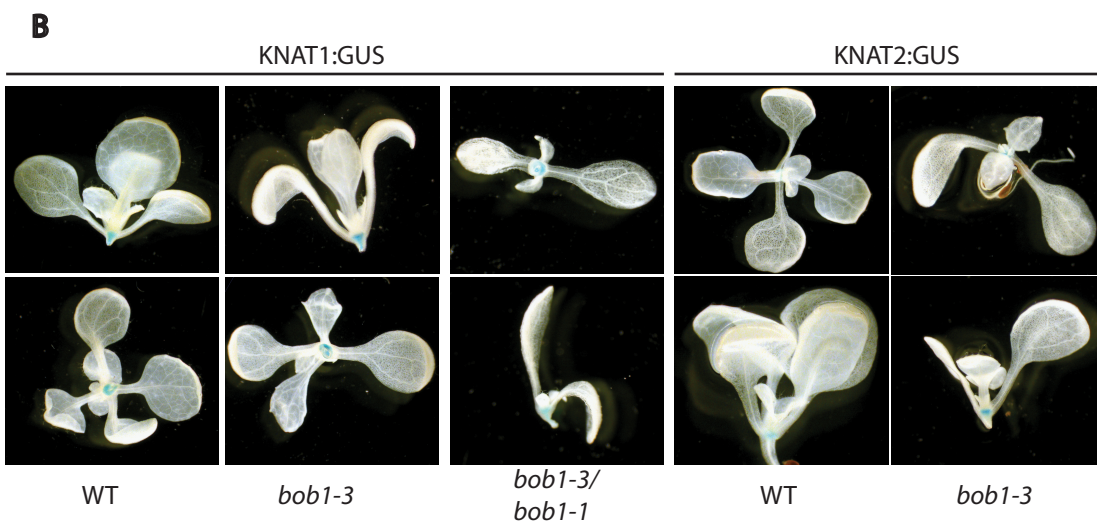

Figure S1. KNOX gene expression in wild type and BOB mutant plants. RT-PCR was used to amplify *AS1* (At2g37630), *KNAT1/BP* (At4g08150), *KNAT2* (At1g70510), *STM* (At1g62360), and *ACTIN2* (At3g18780) transcripts from dissected young leaves and meristems of both wild type, *bob1-3*, and *bob1-3/bob1-1* plants. *AS1* is normally expressed only in leaves and not in meristems while the KNOX genes (*KNAT1/BP*, *KNAT2*, and *STM*) are normally expressed in meristems but not in leaves. *ACTIN2* is expressed in all plant cells and is used as a loading control. *AS1* expression can be detected in both WT and *bob1-3* leaf fractions as well as in meristem fractions indicating that the meristem fractions contain very young leaves that were too small to be dissected away from the meristem proper (lanes 1-4). Each of the KNOX genes was detected in the meristem but not in the leaves in all genotypes demonstrating that i) the leaf samples did not contain any meristematic tissue, and ii) that KNOX genes are not mis-expressed in the leaves in *bob1-3* mutants (lanes 6-9 *KNAT1/BP*, 11-14 *KNAT2*, and 15-18 *STM*). Primers were chosen to span introns where possible and amplified genomic DNA samples (lanes 5, 10, 19, and 24) demonstrate that the RNA samples did not contain detectable levels of genomic DNA (A). *KNAT1:GUS* and *KNAT2:GUS* reporter lines were crossed into *bob1-3* and *bob1-3/bob1-1* backgrounds. Expression of the reporters (blue) is restricted to the meristematic region in all genotypes (B).

## Supplementary Figure 2.

Global analysis of *BOB1* co-expressed genes was performed using ATTED-II (Obayashi et al. 2007). Of the 300 most highly co-regulated genes, the genes listed below are known chaperones or genes involved in high temperature responses. Correlation was determined using 1388 array slides in 58 experiments (see [http://atted.jp/top\\_help.shtml](http://atted.jp/top_help.shtml)).

| Correlation | Locus       | Function                                                             |
|-------------|-------------|----------------------------------------------------------------------|
| 0.76        | At3g44110   | ATJ3 (Arabidopsis thaliana DnaJ homologue 3)                         |
| 0.76        | At5g09590   | mtHSC70-2 (HEAT SHOCK PROTEIN 70)                                    |
| 0.72        | At3g12050   | Aha1 domain-containing protein                                       |
| 0.69        | At5g22060   | ATJ2 (Arabidopsis thaliana DnaJ homologue 2)                         |
| 0.66        | At2g25140   | CLPB-M/CLPB4/HSP98.7 (HEAT SHOCK PROTEIN 98.7)                       |
| 0.66        | At3g23990   | HSP60 (Heat shock protein 60)                                        |
| 0.64        | At5g56030   | HSP81-2 (EARLY-RESPONSIVE TO DEHYDRATION 8)                          |
| 0.64        | 248043_s_at | At5g56010; At5g56000 - Hsp81-3 or Hsp81-4                            |
| 0.61        | At1g14980   | CPN10 (CHAPERONIN 10)                                                |
| 0.56        | At3g09440   | heat shock cognate 70 kDa protein 3 (HSC70-3) (HSP70-3)              |
| 0.56        | At3g12580   | HSP70 (heat shock protein 70)                                        |
| 0.56        | At3g08970   | DNAJ heat shock N-terminal domain-containing protein                 |
| 0.55        | At5g02490   | heat shock cognate 70 kDa protein 2 (HSC70-2) (HSP70-2)              |
| 0.55        | At5g52640   | HSP81-1 (HEAT SHOCK PROTEIN 81-1)                                    |
| 0.54        | At4g28480   | DNAJ heat shock family protein                                       |
| 0.54        | At4g22670   | ATHIP1 (ARABIDOPSIS THALIANA HSP70-INTERACTING PROTEIN 1)            |
| 0.53        | At5g03160   | DNAJ heat shock N-terminal domain-containing protein                 |
| 0.53        | At5g51440   | 23.5 kDa mitochondrial small heat shock protein (HSP23.5-M)          |
| 0.53        | At3g13860   | chaperonin, putative                                                 |
| 0.51        | At4g16660   | heat shock protein 70, putative / HSP70, putative                    |
| 0.49        | At5g02500   | HSC70-1 (heat shock cognate 70 kDa protein 1)                        |
| 0.49        | At1g74310   | ATHSP101 (HEAT SHOCK PROTEIN 101)                                    |
| 0.48        | At3g62600   | DNAJ heat shock family protein                                       |
| 0.48        | At5g56500   | ATP binding / protein binding / unfolded protein binding             |
| 0.47        | At2g20560   | DNAJ heat shock family protein                                       |
| 0.47        | At4g36990   | HsfB1                                                                |
| 0.45        | At3g14200   | DNAJ heat shock N-terminal domain-containing protein                 |
| 0.42        | At2g26150   | ATHSFA2 (Arabidopsis thaliana heat shock transcription factor A2)    |
| 0.42        | At4g11660   | AT-HSFB2B (Arabidopsis thaliana heat shock transcription factor B2B) |
| 0.42        | At1g16030   | HSP70B (heat shock protein 70B)                                      |
| 0.41        | At2g32120   | HSP70T-2                                                             |
| 0.40        | At2g29500   | 17.6 kDa class I small heat shock protein (HSP17.6B-CI)              |
| 0.40        | At1g71000   | DNAJ heat shock N-terminal domain-containing protein                 |
| 0.39        | At4g25200   | ATHSP23.6-MITO (MITOCHONDRION-LOCALIZED SMALL HEAT SHOCK PROTEIN)    |
| 0.39        | At5g37670   | 15.7 kDa class I-related small heat shock protein-like (HSP15.7-CI)  |
| 0.38        | At5g12020   | HSP17.6II (17.6 KDA CLASS II HEAT SHOCK PROTEIN)                     |
| 0.38        | At5g12030   | AT-HSP17.6A (Arabidopsis thaliana heat shock protein 17.6A)          |
| 0.32        | At3g13310   | DNAJ heat shock N-terminal domain-containing protein                 |

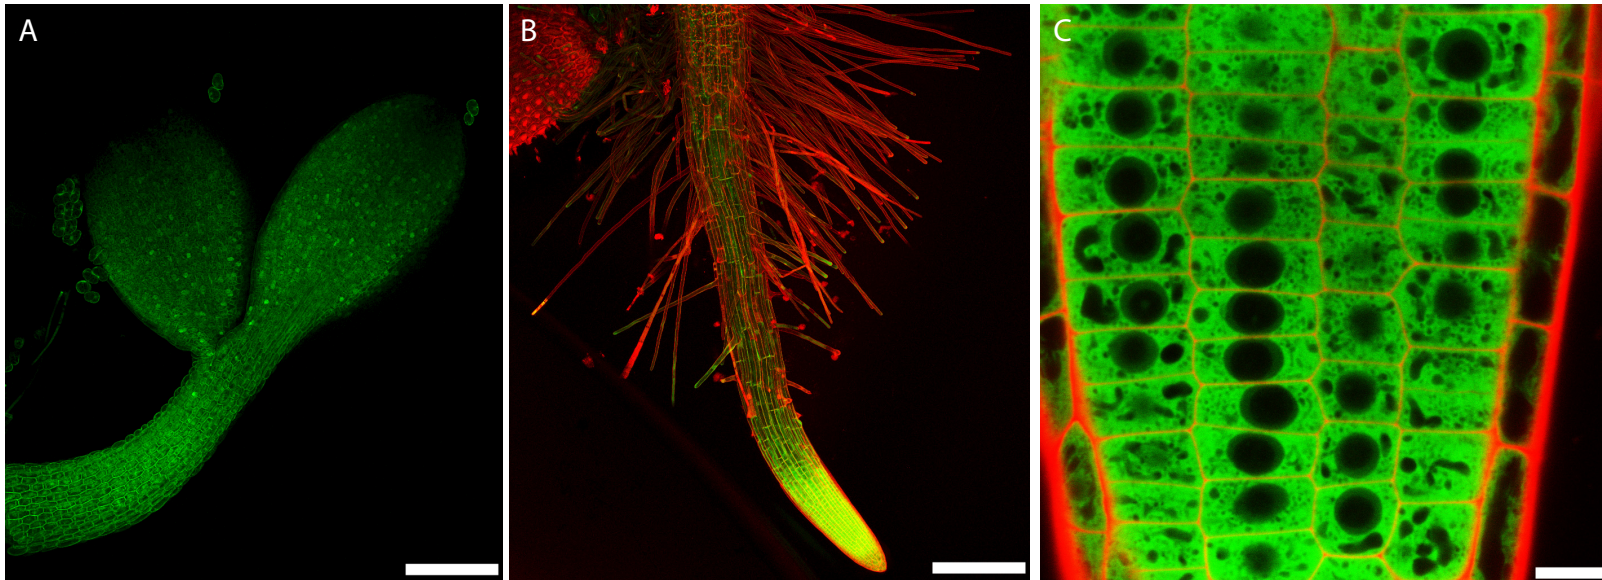

Fig.S3 BOB1:GFP is expressed in all cells of the shoot (A) and root (B) of seedlings with the highest expression levels found at the root tip. BOB1:GFP is localized to the cytoplasm with no obvious subcellular compartmentalization (C). Green signal is GFP, red signal is propidium iodide cell wall staining. Scale bars are 250 $\mu$ m (A and B), 10 $\mu$ m (C).
